# Supplementary material for: Coffee and caffeine intake and incidence of type 2 diabetes mellitus: a meta-analysis of prospective studies
Source: Springer Nature journal article supplement (doi:10.1007/s00394-013-0603-x), 2013-10-22
Supplement: 394_2013_603_MOESM1_ESM.pdf [file 394_2013_603_MOESM1_ESM.pdf]

**Article title:** Coffee and caffeine intake and incidence of type 2 diabetes mellitus: a meta-analysis of prospective studies

**Journal name:** European journal of nutrition

**Author names:** Xiubo Jiang, Dongfeng Zhang, Wenjie Jiang

**Corresponding author:** Dongfeng Zhang, Professor, Department of Epidemiology and Health Statistics, Qingdao University, Shandong, Qingdao 266021, Dongzhou Road, No.38, P. R. China. E-mail: [zhangdf1962@aliyun.com](mailto:zhangdf1962@aliyun.com)

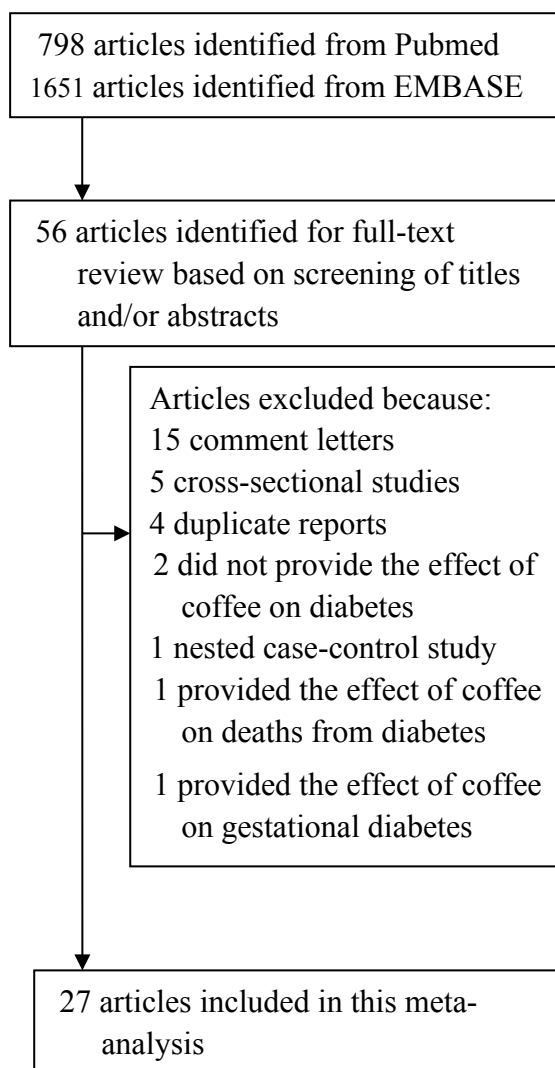

Supplementary Figure 1 The flow-chart for article inclusion in this meta-analysis

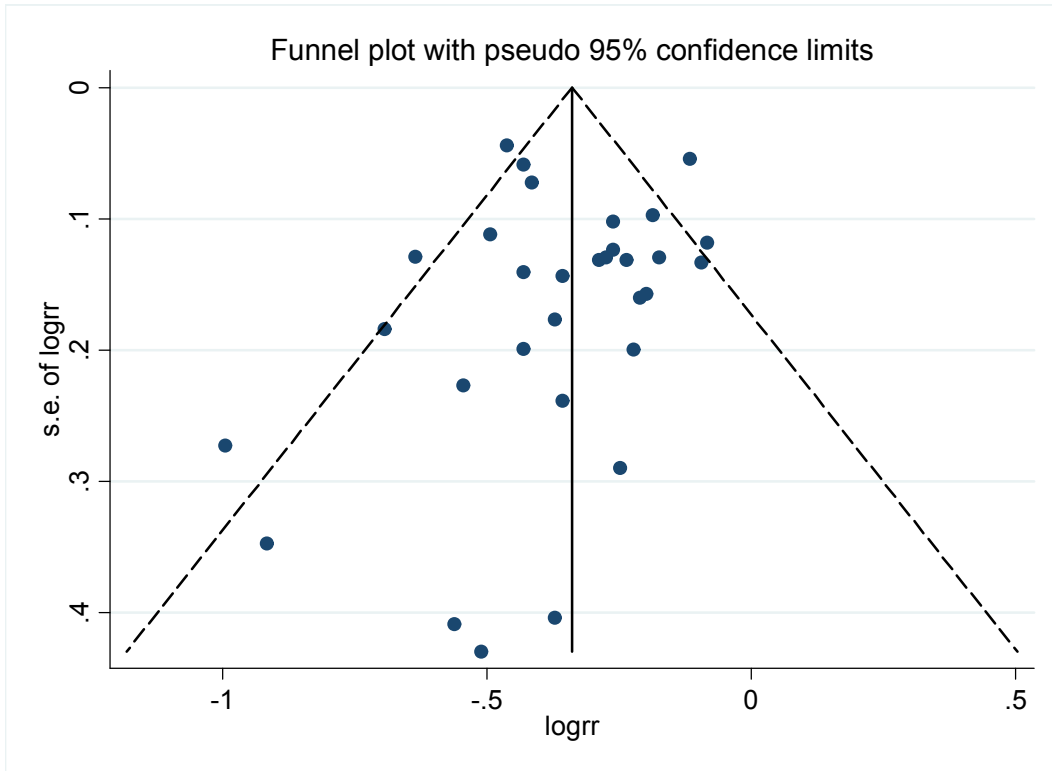

Supplementary Figure 2 Funnel plot for the analysis of coffee intake and incidence of type 2 diabetes mellitus

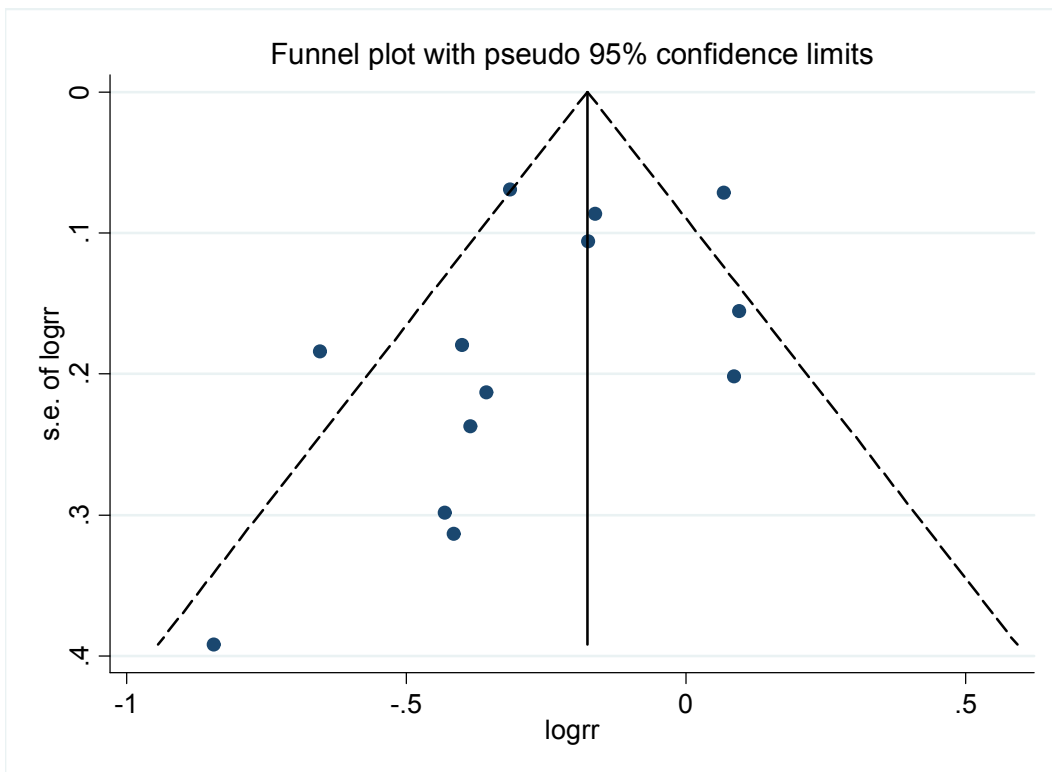

Supplementary Figure 3 Funnel plot for the analysis of decaffeinated coffee intake and incidence of type 2 diabetes mellitus

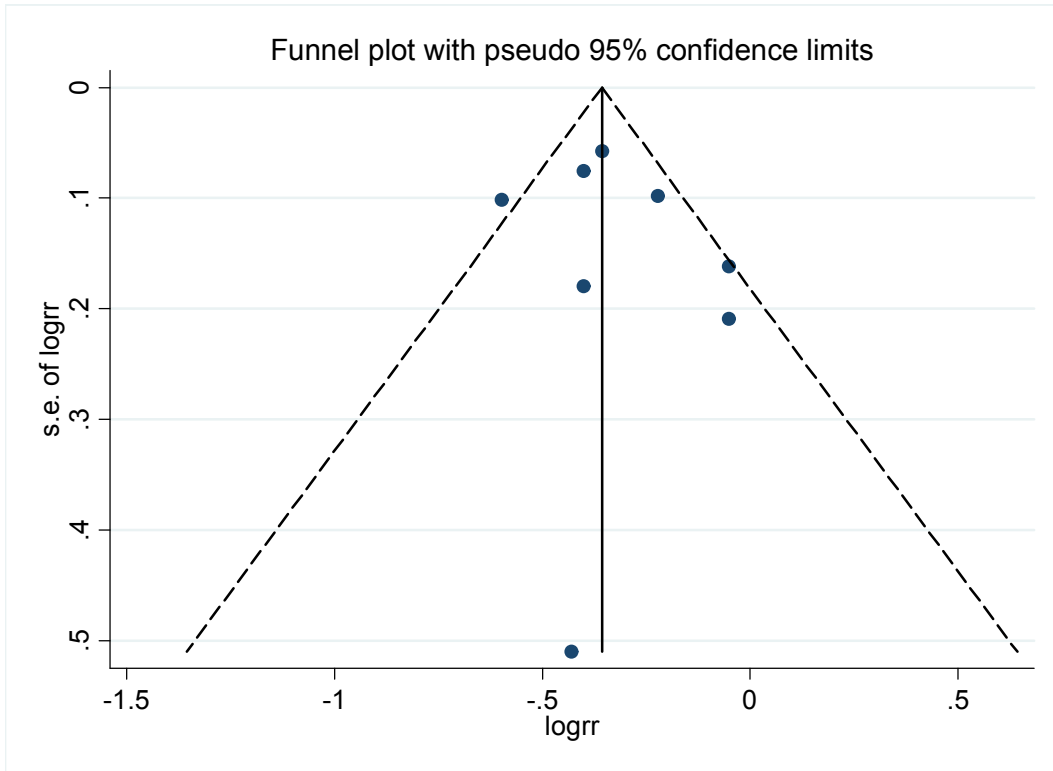

Supplementary Figure 4 Funnel plot for the analysis of caffeine intake and incidence of type 2 diabetes mellitus
